# Supplementary material for: Magnetic resonance imaging-based radiomics in predicting the expression of Ki-67, p53, and epidermal growth factor receptor in rectal cancer
Source: PubMed Central journal article supplement — J Gastrointest Oncol. 2024 Oct 29;15(5):2088–99. doi: 10.21037/jgo-24-220 (PMC11565121; doi:10.21037/jgo-24-220), 2024-10-29
Supplement: jgo-15-05-2088-rc.pdf [file jgo-15-05-2088-rc.pdf]

## TRIPOD Checklist: Prediction Model Development and Validation

| Section                   | Item |     | Checklist description                                                                                                                                                                            | Reported on Page Number/Line Number | Reported on Section/Paragraph                   |
|---------------------------|------|-----|--------------------------------------------------------------------------------------------------------------------------------------------------------------------------------------------------|-------------------------------------|-------------------------------------------------|
| <b>Title and abstract</b> |      |     |                                                                                                                                                                                                  |                                     |                                                 |
| Title                     | 1    | D;V | Identify the study as developing and/or validating a multivariable prediction model, the target population, and the outcome to be predicted.                                                     | Page 1, Line 1-2                    | Title                                           |
| Abstract                  | 2    | D;V | Provide a summary of objectives, study design, setting, participants, sample size, predictors, outcome, statistical analysis, results, and conclusions.                                          | Page 3-4, Line 26-57                | Abstract, Paragraph 1-4                         |
| <b>Introduction</b>       |      |     |                                                                                                                                                                                                  |                                     |                                                 |
| Background and objectives | 3a   | D;V | Explain the medical context (including whether diagnostic or prognostic) and rationale for developing or validating the multivariable prediction model, including references to existing models. | Page 5-7, Line 62-96                | Introduction, Paragraph 1-4                     |
|                           | 3b   | D;V | Specify the objectives, including whether the study describes the development or validation of the model or both.                                                                                | Page 7, Line 97-98                  | Introduction, Paragraph 5                       |
| <b>Methods</b>            |      |     |                                                                                                                                                                                                  |                                     |                                                 |
| Source of data            | 4a   | D;V | Describe the study design or source of data (e.g., randomized trial, cohort, or registry data), separately for the development and validation data sets, if applicable.                          | Page 9, Line 149                    | Feature selection method and model construction |
|                           | 4b   | D;V | Specify the key study dates, including start of accrual; end of accrual; and, if applicable, end of follow-up.                                                                                   | Page 7, Line 104-105                | Patients, Paragraph 2                           |
| Participants              | 5a   | D;V | Specify key elements of the study setting (e.g., primary care, secondary care, general population) including number and location of centres.                                                     | Page 7, Line 101,104,111            | Patients, Paragraph 2                           |
|                           | 5b   | D;V | Describe eligibility criteria for participants.                                                                                                                                                  | Page 7, Line 105-112                | Patients, Paragraph 2                           |
|                           | 5c   | D;V | Give details of treatments received, if relevant.                                                                                                                                                | Page 7, Line 104                    | Patients, Paragraph 2                           |
| Outcome                   | 6a   | D;V | Clearly define the outcome that is predicted by the prediction model, including how and when assessed.                                                                                           | N/A, Not covered in this article    | N/A                                             |
|                           | 6b   | D;V | Report any actions to blind assessment of the outcome to be predicted.                                                                                                                           | N/A, Not covered in this article    | N/A                                             |
| Predictors                | 7a   | D;V | Clearly define all predictors used in developing or validating the multivariable prediction model, including how and when they were measured.                                                    | N/A, Not covered in this article    | N/A                                             |
|                           | 7b   | D;V | Report any actions to blind assessment of predictors for the outcome and other predictors.                                                                                                       | N/A, Not covered in this article    | N/A                                             |

|             |   |     |                                            |                                  |     |
|-------------|---|-----|--------------------------------------------|----------------------------------|-----|
| Sample size | 8 | D;V | Explain how the study size was arrived at. | N/A, Not covered in this article | N/A |
|-------------|---|-----|--------------------------------------------|----------------------------------|-----|

|                              |     |     |                                                                                                                                                                                                       |                                  |                                                 |
|------------------------------|-----|-----|-------------------------------------------------------------------------------------------------------------------------------------------------------------------------------------------------------|----------------------------------|-------------------------------------------------|
| Missing data                 | 9   | D;V | Describe how missing data were handled (e.g., complete-case analysis, single imputation, multiple imputation) with details of any imputation method.                                                  | Page9, Line149-154               | Feature selection method and model construction |
| Statistical analysis methods | 10a | D   | Describe how predictors were handled in the analyses.                                                                                                                                                 | Page9, Line 154-161              | Feature selection method and model construction |
|                              | 10b | D   | Specify type of model, all model-building procedures (including any predictor selection), and method for internal validation.                                                                         | Page9, Line 161-165              | Feature selection method and model construction |
|                              | 10c | V   | For validation, describe how the predictions were calculated.                                                                                                                                         | Page9, Line 161-163              | Feature selection method and model construction |
|                              | 10d | D;V | Specify all measures used to assess model performance and, if relevant, to compare multiple models.                                                                                                   | N/A, Not covered in this article | N/A                                             |
|                              | 10e | V   | Describe any model updating (e.g., recalibration) arising from the validation, if done.                                                                                                               | N/A, Not covered in this article | N/A                                             |
| Risk groups                  | 11  | D;V | Provide details on how risk groups were created, if done.                                                                                                                                             | N/A, Not covered in this article | N/A                                             |
| Development vs. validation   | 12  | V   | For validation, identify any differences from the development data in setting, eligibility criteria, outcome, and predictors.                                                                         | N/A, Not covered in this article | N/A                                             |
| <b>Results</b>               |     |     |                                                                                                                                                                                                       |                                  |                                                 |
| Participants                 | 13a | D;V | Describe the flow of participants through the study, including the number of participants with and without the outcome and, if applicable, a summary of the follow-up time. A diagram may be helpful. | Page7, Line 104-112              | Figure 1                                        |
|                              | 13b | D;V | Describe the characteristics of the participants (basic demographics, clinical features, available predictors), including the number of participants with missing data for predictors and outcome.    | Page10, Line 178-188             | Results, Paragraph 1                            |
|                              | 13c | V   | For validation, show a comparison with the development data of the distribution of important variables (demographics, predictors and outcome).                                                        | N/A, Not covered in this article | N/A                                             |
| Model development            | 14a | D   | Specify the number of participants and outcome events in each analysis.                                                                                                                               | N/A, Not covered in this article | N/A                                             |
|                              | 14b | D   | If done, report the unadjusted association between each candidate predictor and outcome.                                                                                                              | N/A, Not covered in this article | N/A                                             |
| Model specification          | 15a | D   | Present the full prediction model to allow predictions for individuals (i.e., all regression coefficients, and model intercept or baseline survival at a given time point).                           | N/A, Not covered in this article | N/A                                             |
|                              | 15b | D   | Explain how to the use the prediction model.                                                                                                                                                          | N/A, Not covered in this article | N/A                                             |

|                   |    |     |                                                                                                                  |                         |                         |
|-------------------|----|-----|------------------------------------------------------------------------------------------------------------------|-------------------------|-------------------------|
| Model performance | 16 | D;V | Report performance measures (with CIs) for the prediction model.                                                 | Page10, Line201-209     | Results, Paragraph 3    |
| Model-updating    | 17 | V   | If done, report the results from any model updating (i.e., model specification, model performance).              | Page10, Line 201-209    | Results, Paragraph 3    |
| <b>Discussion</b> |    |     |                                                                                                                  |                         |                         |
| Limitations       | 18 | D;V | Discuss any limitations of the study (such as nonrepresentative sample, few events per predictor, missing data). | Page14-15, Line 292-304 | Discussion, Paragraph 4 |

|                           |     |     |                                                                                                                                                    |                         |                           |
|---------------------------|-----|-----|----------------------------------------------------------------------------------------------------------------------------------------------------|-------------------------|---------------------------|
| Interpretation            | 19a | V   | For validation, discuss the results with reference to performance in the development data, and any other validation data.                          | Page12-13, Line 225-271 | Discussion, Paragraph 2   |
|                           | 19b | D;V | Give an overall interpretation of the results, considering objectives, limitations, and results from similar studies, and other relevant evidence. | Page12-15, Line 225-304 | Discussion, Paragraph 2-4 |
| Implications              | 20  | D;V | Discuss the potential clinical use of the model and implications for future research.                                                              | Page15, Line306-309     | Conclusion                |
| <b>Other information</b>  |     |     |                                                                                                                                                    |                         |                           |
| Supplementary information | 21  | D;V | Provide information about the availability of supplementary resources, such as study protocol, Web calculator, and data sets.                      | Page21, Line 448-450    | Supplement                |
| Funding                   | 22  | D;V | Give the source of funding and the role of the funders for the present study.                                                                      | Page15, Line313-315     | Acknowledgments           |

\* Items relevant only to the development of a prediction model are denoted by D, items relating solely to a validation of a prediction model are denoted by V, and items relating to both are denoted D;V. We recommend using the TRIPOD Checklist in conjunction with the TRIPOD Explanation and Elaboration document.

Article Information: <https://dx.doi.org/10.21037/jgo-24-220>

\*As the checklist was provided upon initial submission, the page number/line number reported may be changed due to copyediting and may not be referable in the published version. In this case, the section/paragraph may be used as an alternative reference.
